# Supplementary material
Source: publisher figshare collection journal article supplement (https://sage.figshare.com/ndownloader/files/17448203)
Supplement: Supplementary file 1 [file 17448203]

| Study                                | Date | Area of interest                                                                                                   | Study design/methods                                                   | Human or animal  | Number studied | Mode of sepsis/entry criteria                       |
|--------------------------------------|------|--------------------------------------------------------------------------------------------------------------------|------------------------------------------------------------------------|------------------|----------------|-----------------------------------------------------|
| <b>Biomarkers</b>                    |      |                                                                                                                    |                                                                        |                  |                |                                                     |
| <b>Teng et al<sup>9</sup></b>        | 2012 | MMP9 as a biomarker for MODS severity.<br>Relationship between serum and tissue MMP9                               | ELISA<br>Immunohistochemistry                                          | Rat              | 36             | Left eyeball removal followed by LPS                |
| <b>Li et al<sup>10</sup></b>         | 2015 | Prognostic value of natriuretic peptides in with MODS                                                              | BNP and ANP assays                                                     | Human            | 26             | Polytrauma (ISS>16)                                 |
| <b>Sugita et al<sup>11</sup></b>     | 2017 | Correlation of HMGB1, NSE and IL-6 with SOFA score to determine their prognostic value                             | Prospective observational study                                        | Human            | 128            | Post-cardiac arrest                                 |
| <b>Cellular Biology</b>              |      |                                                                                                                    |                                                                        |                  |                |                                                     |
| <b>Gu et al<sup>13</sup></b>         | 2018 | Differential expression of genes between tissues in MODS and healthy controls                                      | Microarray analysis                                                    | Murine           | 27             | MV and <i>S.aureus</i> pneumonia                    |
| <b>Oive et al<sup>14</sup></b>       | 2010 | Monocyte signalling profiles in acute pancreatitis and organ failure                                               | Flow cytometry                                                         | Human            | 13             | Acute pancreatitis complicated by organ dysfunction |
| <b>Uhlig et al<sup>16</sup></b>      | 2002 | Ventilation induced changes in MAPK phosphorylation                                                                | Western blot analysis                                                  | Rat and mouse    |                | High pressure ventilation in isolated lung          |
| <b>Di Paola et al<sup>17</sup></b>   | 2009 | Effect of PD98059 (MAPK inhibitor) on non-septic shock.<br>Cell surface changes, iNOS, Bcl2 among others assessed. | Assessment of acute inflammation in the abdomen.<br>Various laboratory | Mouse            | 120            | Zymosan                                             |
| <b>Altemeier et al<sup>18</sup></b>  | 2005 | Gene expression in ALI and the influence mechanical ventilation has on this.                                       | Microarray analysis                                                    | Mouse            | 24             | Aspirated LPS                                       |
| <b>Jabandziev et al<sup>19</sup></b> | 2014 | SNPs of five genes.                                                                                                | PCR and restriction analysis.                                          | Human (children) | 1127           | Variable                                            |
| <b>Gharib et al<sup>20</sup></b>     | 2016 | Identification of differentially expressed genes in organs in SIRS                                                 | Microarray<br>qPCR                                                     | Mouse            |                | <i>S.aureus</i> inoculation and MV (VAP)            |
| <b>Madach et al<sup>21</sup></b>     | 2010 | Polymorphisms of PAI-1 gene                                                                                        | Prospective data collection. PCR analysis.                             | Human            | 208            | Due to pneumonia                                    |
| <b>Protti et al<sup>26</sup></b>     | 2007 | Mitochondrial dysfunction and MODS. Complex I dysfunction and the use of succinate                                 | Measurement of mitochondrial complex activity and oxygen consumption.  | Rat              |                | Fecal peritonitis                                   |
| <b>Fredrikss</b>                     | 2006 | Mitochondrial dysfunction in muscle                                                                                | Muscle biopsies with spectrophotometric                                | Human            | 10             | Sepsis induced multiple organ failure               |

|                                     |      |                                                                                                                  |                                                                                               |              |     |                                              |
|-------------------------------------|------|------------------------------------------------------------------------------------------------------------------|-----------------------------------------------------------------------------------------------|--------------|-----|----------------------------------------------|
| <b>on et al<sup>28</sup></b>        |      | of critically ill patients                                                                                       | and microscopic analysis                                                                      |              |     |                                              |
| <b>Carre et al<sup>29</sup></b>     | 2010 | Interaction of mitochondrial biogenesis and critical illness.                                                    | Muscle biopsies from patients in ICU.                                                         | Human        | 16  | Critical illness and multiple organ failure. |
| <b>Malaisse et al<sup>30</sup></b>  | 1997 | The potential therapeutic utility of succinic acid in endotoxemia                                                |                                                                                               | Rat          |     | LPS injections                               |
| <b>Miyaji et al<sup>31</sup></b>    | 2003 | Ethyl pyruvate and sepsis induced organ dysfunction                                                              | Histology<br>Reverse transcription PCR<br>Western blot                                        | Mouse        |     | LPS and CLP                                  |
| <b>Lowes et al<sup>32</sup></b>     | 2008 | Mitochondria specific antioxidants and organ damage secondary to sepsis                                          |                                                                                               | Rat          |     | LPS                                          |
| <b>Piel et al<sup>33</sup></b>      | 2007 | Cytochrome oxidase inhibition and reduced substrate availability and the relationship to myocardial dysfunction. |                                                                                               | Mouse        | 75  | CLP                                          |
| <b>Fauvel et al<sup>34</sup></b>    | 2002 | Protective effects of cyclosporin                                                                                | Spectrophotometer<br>Western blot<br>ELISA                                                    | Rats         |     | Endotoxin                                    |
| <b>Vinokurov et al<sup>36</sup></b> | 2011 | The role of HSP70 and protection against inflammatory changes                                                    | Assays for ROS, TNF- $\alpha$ and CD11 expression                                             | Rat          |     | LTA injections                               |
| <b>Wang et al<sup>37</sup></b>      | 2016 | Effect of 17-DMAG on MODS through HSP90 inhibition                                                               | ELISA<br>Western blot                                                                         | Rat          |     |                                              |
| <b>Zeng et al<sup>38</sup></b>      | 2015 | Rs1800625 association with sepsis mortality and MODS development.                                                | Genotyped using pyrosequencing                                                                | Human        | 837 | Major trauma                                 |
|                                     |      |                                                                                                                  |                                                                                               |              |     |                                              |
| <b>Gunst<sup>41</sup></b>           | 2013 | The role of hyperglycemia and autophagy, mitochondrial dysfunction and repair In critical illness.               | Prospective randomised study.                                                                 | Rabbits      | 3   |                                              |
| <b>Chung et al<sup>42</sup></b>     | 2017 | Effect of oestrogen on autophagy in ovariectomised rats                                                          | Various laboratory techniques                                                                 | Rat          | 90  | LPS infusion                                 |
| <b>Nakahira et al<sup>43</sup></b>  | 2011 | Autophagic proteins and their role in regulation of caspase 1 mediated innate immune responses.                  | Flow cytometry<br>ELISA<br>Immunoblot<br>Transmission electron microscopy<br>qPCR<br>and more | Rat<br>Human |     | LPS infusion<br>CLP                          |

|                                         |      |                                                                                                            |                                                                                      |       |     |                                                |
|-----------------------------------------|------|------------------------------------------------------------------------------------------------------------|--------------------------------------------------------------------------------------|-------|-----|------------------------------------------------|
| <b>Cui et al<sup>45</sup></b>           | 2017 | Determination of the role that necroptosis has in MODS<br><br>Measurement of lung, liver and kidney damage | Western blotting<br>ELISA<br>Staining and immunohistochemistry<br>Immunofluorescence | Rats  |     | Fracture trauma and haemorrhage                |
| <b>Inflammation and immune response</b> |      |                                                                                                            |                                                                                      |       |     |                                                |
| <b>Cabrera et al<sup>48</sup></b>       | 2017 | Comparison of the transcriptome among patients with trauma and healthy volunteers                          | Whole blood transcriptome and flow cytometry                                         | Human | 70  | Critically injured patients (ISS>25)           |
| <b>Jun et al<sup>49</sup></b>           | 2011 | NFkB activity and cytokine levels                                                                          | Flow cytometry<br>ELISA                                                              | Human | 71  | Multiple injuries (ISS>16)                     |
| <b>Uchida et al<sup>50</sup></b>        | 2018 | Ulnistatin and 28-day all cause mortality in multiple organ failure (MOF).                                 | Retrospective observational study<br>Multivariable regression analysis               | Human | 212 | Diagnosis of MOF within 24hrs of ICU admission |
| <b>Bakopoulos et al<sup>52</sup></b>    | 2017 | Expression of TLRs in lung during sepsis                                                                   | Immunofluorescence and PCR of lung tissue.                                           | Mouse | 72  | CLP                                            |
| <b>Lv et al<sup>53</sup></b>            | 2014 | Splenic dendritic cell model                                                                               | Immunohistochemistry and flow cytometry                                              | Mouse | 165 | Intraperitoneal zymosan                        |
| <b>Andruszkow et al<sup>54</sup></b>    | 2014 | Correlation of IL-6 and MODS development in children                                                       | Immunoassay                                                                          | Human | 59  | Trauma patients (ISS>9).                       |
| <b>Manson et al<sup>56</sup></b>        | 2016 | Populations of different lymphocytes and cytokines in trauma                                               | Observational cohort<br>Flow cytometry<br>ELISA                                      | Human | 38  | Blunt trauma (ISS>25)                          |
| <b>Kirchhoff et al<sup>57</sup></b>     | 2009 | Cytokine synthesis                                                                                         | Flow cytometry                                                                       | Human | 13  | LPS                                            |
| <b>Sapan et al<sup>58</sup></b>         | 2017 | Plasma levels of IL-6 and IL-10 . mRNA expression.                                                         | Prospective multicentre trial.                                                       | Human | 54  | Polytrauma patients (ISS>16).                  |
| <b>Luan et al<sup>59</sup></b>          | 2015 | Tregs and effect on apoptosis. CTLA-4, Foxp3 and TGF                                                       | Flow cytometry                                                                       | Mouse | 180 | CLP                                            |
| <b>Hazeldine et al<sup>60</sup></b>     | 2017 | Ultra-early changes in composition and function of immune cells and cytokines                              | Various                                                                              | Human | 89  | Trauma patients (mean ISS 24)                  |
| <b>Hall et al<sup>61</sup></b>          | 2010 |                                                                                                            | Multicentre cohort trial                                                             | Human |     |                                                |
| <b>Kim et al<sup>62</sup></b>           | 2014 | Mesenchymal stromal cells and cytokine production                                                          |                                                                                      | Mouse |     | Staphylococcal enterotoxin B                   |
| <b>Jia et al<sup>63</sup></b>           | 2013 | Number of Tregs<br>Cytokines                                                                               | Western blot<br>ELISA                                                                | Mouse | 80  | Zymosan                                        |

|                                    |      |                                                                                                              |                                                                                           |        |     |                                                       |
|------------------------------------|------|--------------------------------------------------------------------------------------------------------------|-------------------------------------------------------------------------------------------|--------|-----|-------------------------------------------------------|
|                                    |      |                                                                                                              | PCR                                                                                       |        |     |                                                       |
| <b>Gao et al<sup>64</sup></b>      | 2017 | Vitamin C and immunosuppression in sepsis induced MODS                                                       | Flow cytometry<br>RT-PCR                                                                  | Mouse  |     | CLP                                                   |
| <b>Guo et al<sup>65</sup></b>      | 2017 | Th17/Treg imbalance in sepsis. Effects of high-volume hemofiltration                                         | Flow cytometry<br>ELISA                                                                   | Human  | 48  | Admission with sepsis                                 |
| <b>Namas et al<sup>67</sup></b>    | 2016 | Multiple inflammatory mediators to derive “inflammatory barcodes”.                                           | Principle component analysis/hierarchical clustering                                      | Human  | 472 | Blunt trauma                                          |
| <b>Endothelial dysfunction</b>     |      |                                                                                                              |                                                                                           |        |     |                                                       |
| <b>Bomsztyk et al<sup>68</sup></b> | 2015 | Epigenetic modifications of angiogenic genes in endothelial dysfunction in sepsis.                           | Western blot<br>RNA extraction and cDNA synthesis<br>Chromatin preparation and ChIP assay | Mouse  |     | <i>S.aureus</i> pneumonia                             |
| <b>Wada et al<sup>69</sup></b>     | 2012 | Angiogenic factors and their use to predict organ dysfunction                                                | Assays for VEGF, VEGF receptor, Ang1, Ang2, Tie2 receptor                                 | Human  | 52  | Post cardiac arrest                                   |
| <b>Lin et al<sup>70</sup></b>      | 2015 | Determine relationship between levels of Ang-1/2, Tie2 and VEGF in MODS                                      | Prospective<br>ELISA                                                                      | Human  | 96  | Diagnosis of sepsis                                   |
| <b>Call et al<sup>71</sup></b>     | 2017 | Extracellular superoxide dismutase and it's protective role in endothelial activation in MODS                | Variable                                                                                  | Mouse  |     | LPS injection                                         |
| <b>Coletta et al<sup>72</sup></b>  | 2014 | Effect of aging on endothelial dysfunction and MODS development. Indices of organ dysfunction also measured. | CVD panel<br>Aortic ring assay<br>Various other biochemical assays                        | Mouse  |     | CLP                                                   |
| <b>Peng et al<sup>73</sup></b>     | 2013 | The effect of serum from patients with SIRS and MODS on endothelial progenitor cells.                        | PCR<br>Angiogenesis assay<br>Migration assay                                              | Humans | 20  | Patients with either SIRS or MODS from various causes |
| <b>Gut and MODS</b>                |      |                                                                                                              |                                                                                           |        |     |                                                       |
| <b>Loui et al<sup>76</sup></b>     | 2013 | Bacterial translocation and MODS                                                                             | Variable                                                                                  | Mouse  | 139 | LPS infusion followed by zymozan.                     |
| <b>Moore et al<sup>77</sup></b>    | 1991 | The association between injury and gut translocation into the portal venous system.                          | Portal venous blood sampling                                                              |        | 20  | Injured patients requiring emergency laparotomy.      |
| <b>Senthil et al<sup>78</sup></b>  | 2007 | The gut derived lymphatic fluid, and its ability to induce lung injury.                                      | Lung permeability and lung histology                                                      | Rat    |     | Trauma/haemorrhagic shock                             |

|                                        |      |                                                                                                                        |                                                                               |        |     |                                                            |
|----------------------------------------|------|------------------------------------------------------------------------------------------------------------------------|-------------------------------------------------------------------------------|--------|-----|------------------------------------------------------------|
| <b>Badami et al<sup>79</sup></b>       | 2008 | The contribution in terms of lethality of mesenteric lymph factors                                                     |                                                                               | Rat    |     | Splanchnic artery occlusion shock model                    |
| <b>Yoseph et al<sup>81</sup></b>       | 2016 | Time course and mechanisms of intestinal barrier dysfunction through tight junction protein changes                    | Western blot<br>PCR<br>Immunohistochemistry                                   | Mouse  |     | CLP                                                        |
| <b>Cheng et al<sup>82</sup></b>        | 2013 | Intra-abdominal hypertension and intestinal mucosal injury                                                             | Doppler measurement of microcirculatory blood flow<br>Intestinal injury assay | Rabbit | 96  | Pneumoperitoneum                                           |
| <b>Osuka et al<sup>83</sup></b>        | 2017 | Intestinal damage following burn. Use of I-FABP as a biomarker of intestinal damage.                                   | Prospective cohort study.<br>I-FABP assay.<br>Other biomarkers recorded.      | Human  | 32  | TBSA>20%                                                   |
| <b>Management</b>                      |      |                                                                                                                        |                                                                               |        |     |                                                            |
| <b>Nguyen et al<sup>86</sup></b>       | 2008 | The role of plasma exchange in children with thrombocytopenic - associated multi organ failure.                        | Observational<br>Randomised control trial                                     | Human  | 37  | >2 organ dysfunction                                       |
| <b>Kawai et al<sup>87</sup></b>        | 2015 | The effect of plasma exchange on haemodynamic and organ failure                                                        | Retrospective analysis                                                        | Human  | 14  | MODS                                                       |
| <b>Rajasekar an et al<sup>88</sup></b> | 2014 | Description of experience with anakinra, a recombinant interleukin-1 receptor antagonist.                              | Retrospective case series                                                     | Human  | 8   | Children with secondary hemophagocytic lymphohistiocytosis |
| <b>Chang et al<sup>89</sup></b>        | 2014 | Anti-programmed cell death ligand 1 (PD-1) in patients with sepsis.                                                    | Flow cytometry                                                                | Human  | 58  | Sepsis as per a consensus panel definition.                |
| <b>Brahmam dam et al<sup>90</sup></b>  | 2010 | Anti-PD-1 and survival in sepsis.                                                                                      | Flow cytometry                                                                | Mice   | 8   | CLP                                                        |
| <b>Inoue et al<sup>91</sup></b>        | 2012 | Anti CTLA-4 therapy and survival in sepsis.                                                                            | Flow cytometry                                                                | Mice   |     | CLP                                                        |
| <b>Banares et al<sup>93</sup></b>      | 2013 | Extracorporeal albumin dialysis in acute on chronic liver failure.                                                     | Multicentre RCT                                                               | Human  | 189 | Acute on chronic liver failure (AOCLF)                     |
| <b>Kribben et al<sup>94</sup></b>      | 2012 | Fractionated plasma separation and adsorption and its survival impact on patients with acute on chronic liver failure. | RCT                                                                           | Human  | 145 | AOCLF                                                      |
| <b>Reviews and others (in bold)</b>    |      |                                                                                                                        |                                                                               |        |     |                                                            |
|                                        |      | Main focus of article                                                                                                  |                                                                               |        |     |                                                            |
| <b>Giannoni</b>                        | 2013 | To summarise and compare commonly used organ dysfunction scores.                                                       |                                                                               |        |     |                                                            |

|                                         |      |                                                                                                                   |
|-----------------------------------------|------|-------------------------------------------------------------------------------------------------------------------|
| <b>et al</b> <sup>12</sup>              |      |                                                                                                                   |
| <b>McGhan et al</b> <sup>15</sup>       | 2012 | The role of TLR4 in the pathogenesis of multi organ failure in haemorrhagic shock and resuscitation               |
| <b>Thiessen et al</b> <sup>22</sup>     | 2018 | The role of mitochondria in critical illness induced multiple organ failure                                       |
| <b>Fink</b> <sup>23</sup>               | 2001 | The role of altered cellular metabolism in MODS pathogenesis.                                                     |
| <b>Zheng et al</b> <sup>24</sup>        | 2015 | The current experimental treatment of mitochondrial dysfunction and sepsis.                                       |
| <b>Szabo et al</b> <sup>25</sup>        | 2014 | The role of peroxynitrate in haemorrhagic and endotoxic shock.                                                    |
| <b>Brownlee et al</b> <sup>27</sup>     | 2005 | A unifying mechanism for diabetic complications                                                                   |
| <b>Dare et al</b> <sup>35</sup>         | 2009 | The range of mitochondrial therapies which could be used in MODS and sepsis.                                      |
| <b>Yang et al</b> <sup>39</sup>         | 2017 | The contribution of HMGB1 and histones towards systemic inflammation and organ injury during acute pancreatitis.  |
| <b>Gunst</b> <sup>40</sup>              | 2017 | <b>Editorial.</b> The role of autophagy in critical illness. The implication of artificial feeding and autophagy. |
| <b>Galluzzi et al</b> <sup>44</sup>     | 2017 | The molecular mechanisms of necroptosis and it's relevance to disease                                             |
| <b>Robinson et al</b> <sup>46</sup>     | 2019 | Pyroptosis, necroptosis and programmed cell death in general                                                      |
| <b>Gao et al</b> <sup>47</sup>          | 2018 | The molecular mechanisms of pyroptosis in sepsis                                                                  |
| <b>Zhou et al</b> <sup>51</sup>         | 2019 | <b>Meta-analysis.</b> Resveratrol and its efficacy and safety in sepsis treatment in animal models.               |
| <b>Jaffer et al</b> <sup>55</sup>       | 2010 | The pro- and anti-inflammatory cytokine profile of sepsis and organ dysfunction                                   |
| <b>Qiu et al</b> <sup>66</sup>          | 2013 | <b>Meta-analysis.</b> Anti-TNF therapy in sepsis and effects on survival.                                         |
| <b>Spapen et al</b> <sup>74</sup>       | 2017 | Proposed pathways of MODS development                                                                             |
| <b>Carrico et al</b> <sup>75</sup>      | 1986 |                                                                                                                   |
| <b>Klingensmith et al</b> <sup>80</sup> | 2016 | The cellular and molecular mechanisms by which the gut contributes to MODS development.                           |
| <b>Ronco et al</b> <sup>84</sup>        | 2003 | The role of the peak concentration hypothesis in continuous renal replacement therapy in sepsis.                  |
| <b>Rimmer et al</b> <sup>85</sup>       | 2014 | <b>Meta-analysis.</b> Evaluation of the efficacy and safety of plasma exchange in patients with sepsis.           |

|                               |      |                                                              |
|-------------------------------|------|--------------------------------------------------------------|
| <b>Lee et al<sup>92</sup></b> | 2016 | Description a range of extracorporeal liver support devices. |
|-------------------------------|------|--------------------------------------------------------------|
